# Supplementary material for: Global, regional, and national burden and trends of migraine among youths and young adults aged 15–39 years from 1990 to 2021: findings from the global burden of disease study 2021
Source: PubMed Central journal article supplement (PMC11318134; doi:10.1186/s10194-024-01832-0), 2024-08-12
Supplement: 10194_2024_1832_MOESM3_ESM.pdf [file 10194_2024_1832_MOESM3_ESM.pdf]

**Global**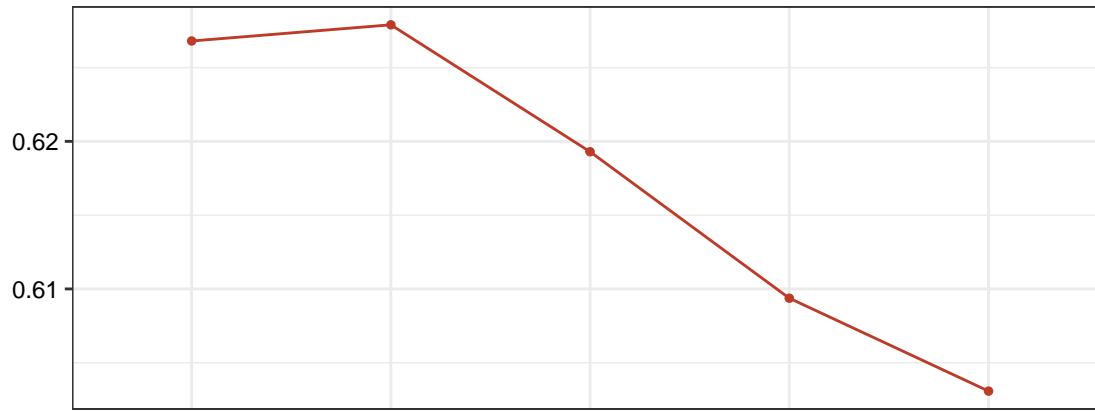**High SDI**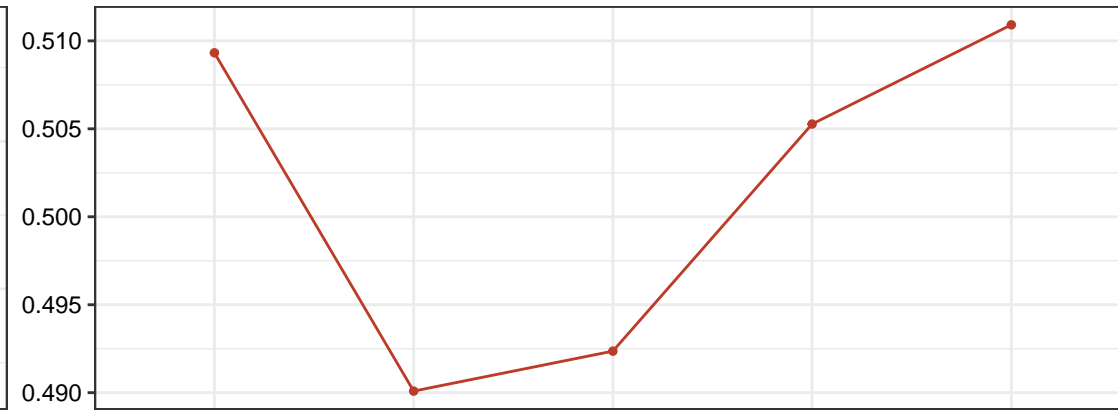**High-middle SDI**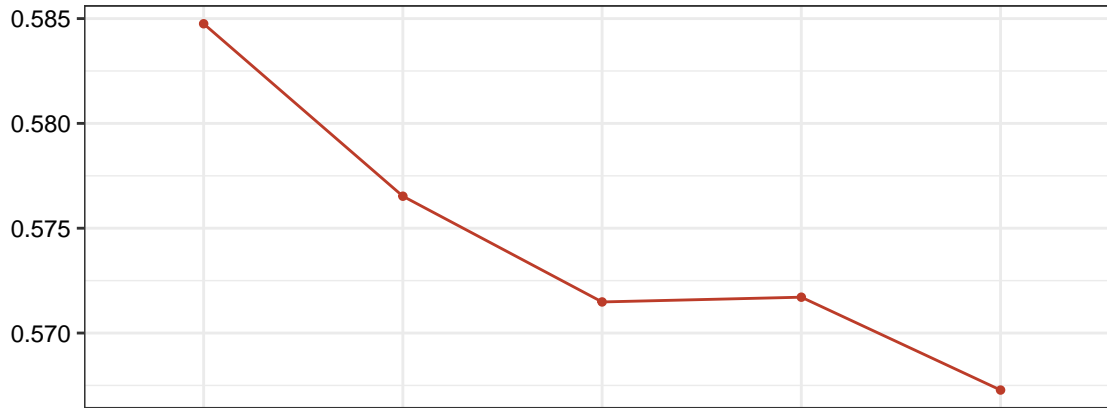**Middle SDI**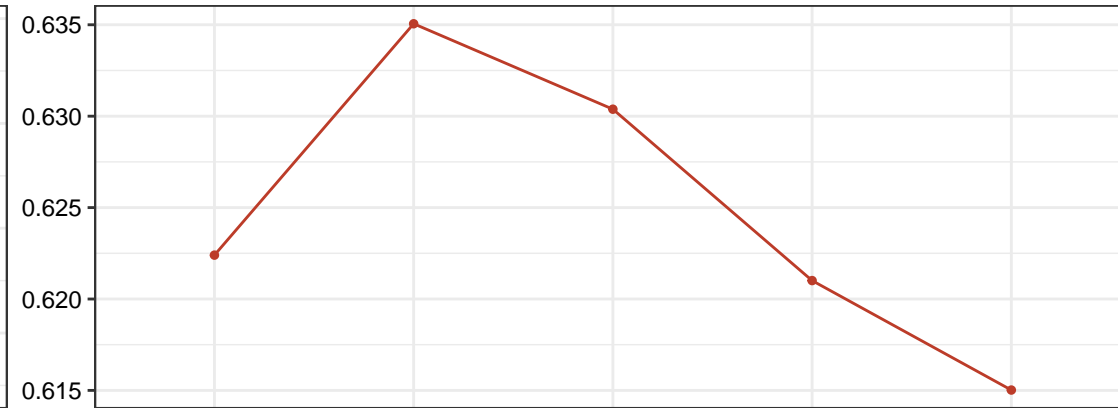**Low-middle SDI**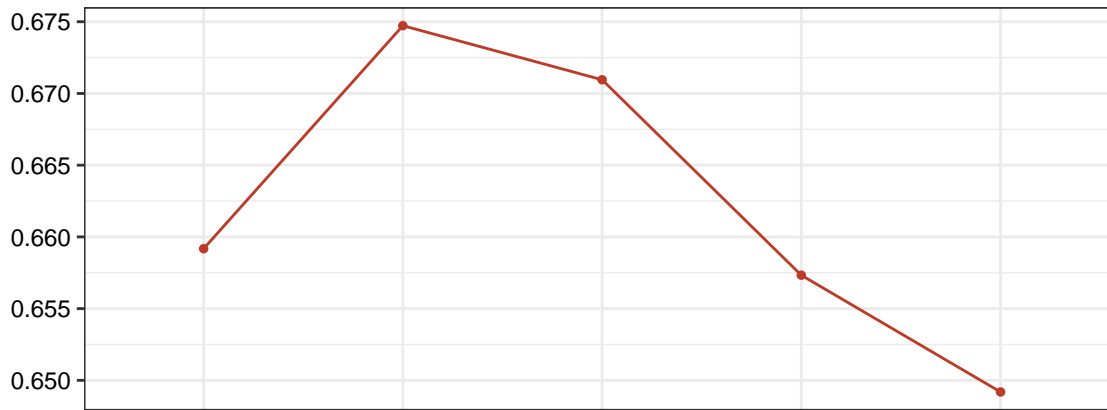**Low SDI**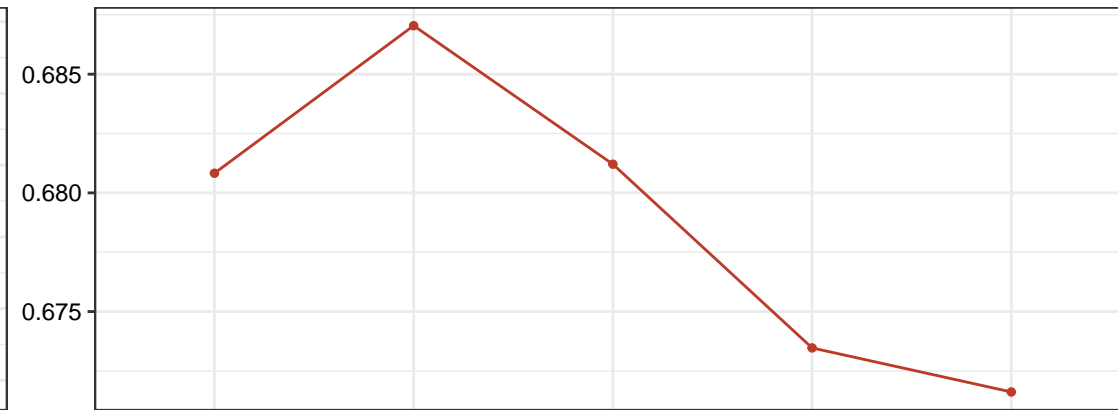

15-19 years

20-24 years

25-29 years

30-34 years

35-39 years

15-19 years

20-24 years

25-29 years

30-34 years

35-39 years

Incidence Male/Female
