# Supplementary material for: Global, regional, and national burden and trends of migraine among youths and young adults aged 15–39 years from 1990 to 2021: findings from the global burden of disease study 2021
Source: PubMed Central journal article supplement (PMC11318134; doi:10.1186/s10194-024-01832-0), 2024-08-12

1990

2021

35-39 years

30-34 years

25-29 years

20-24 years

15-19 years

Female

Male

Female

Male

location

- High SDI
- Low-middle SDI
- High-middle SDI
- Middle SDI
- Low SDI

Rate (per 100000 populations)

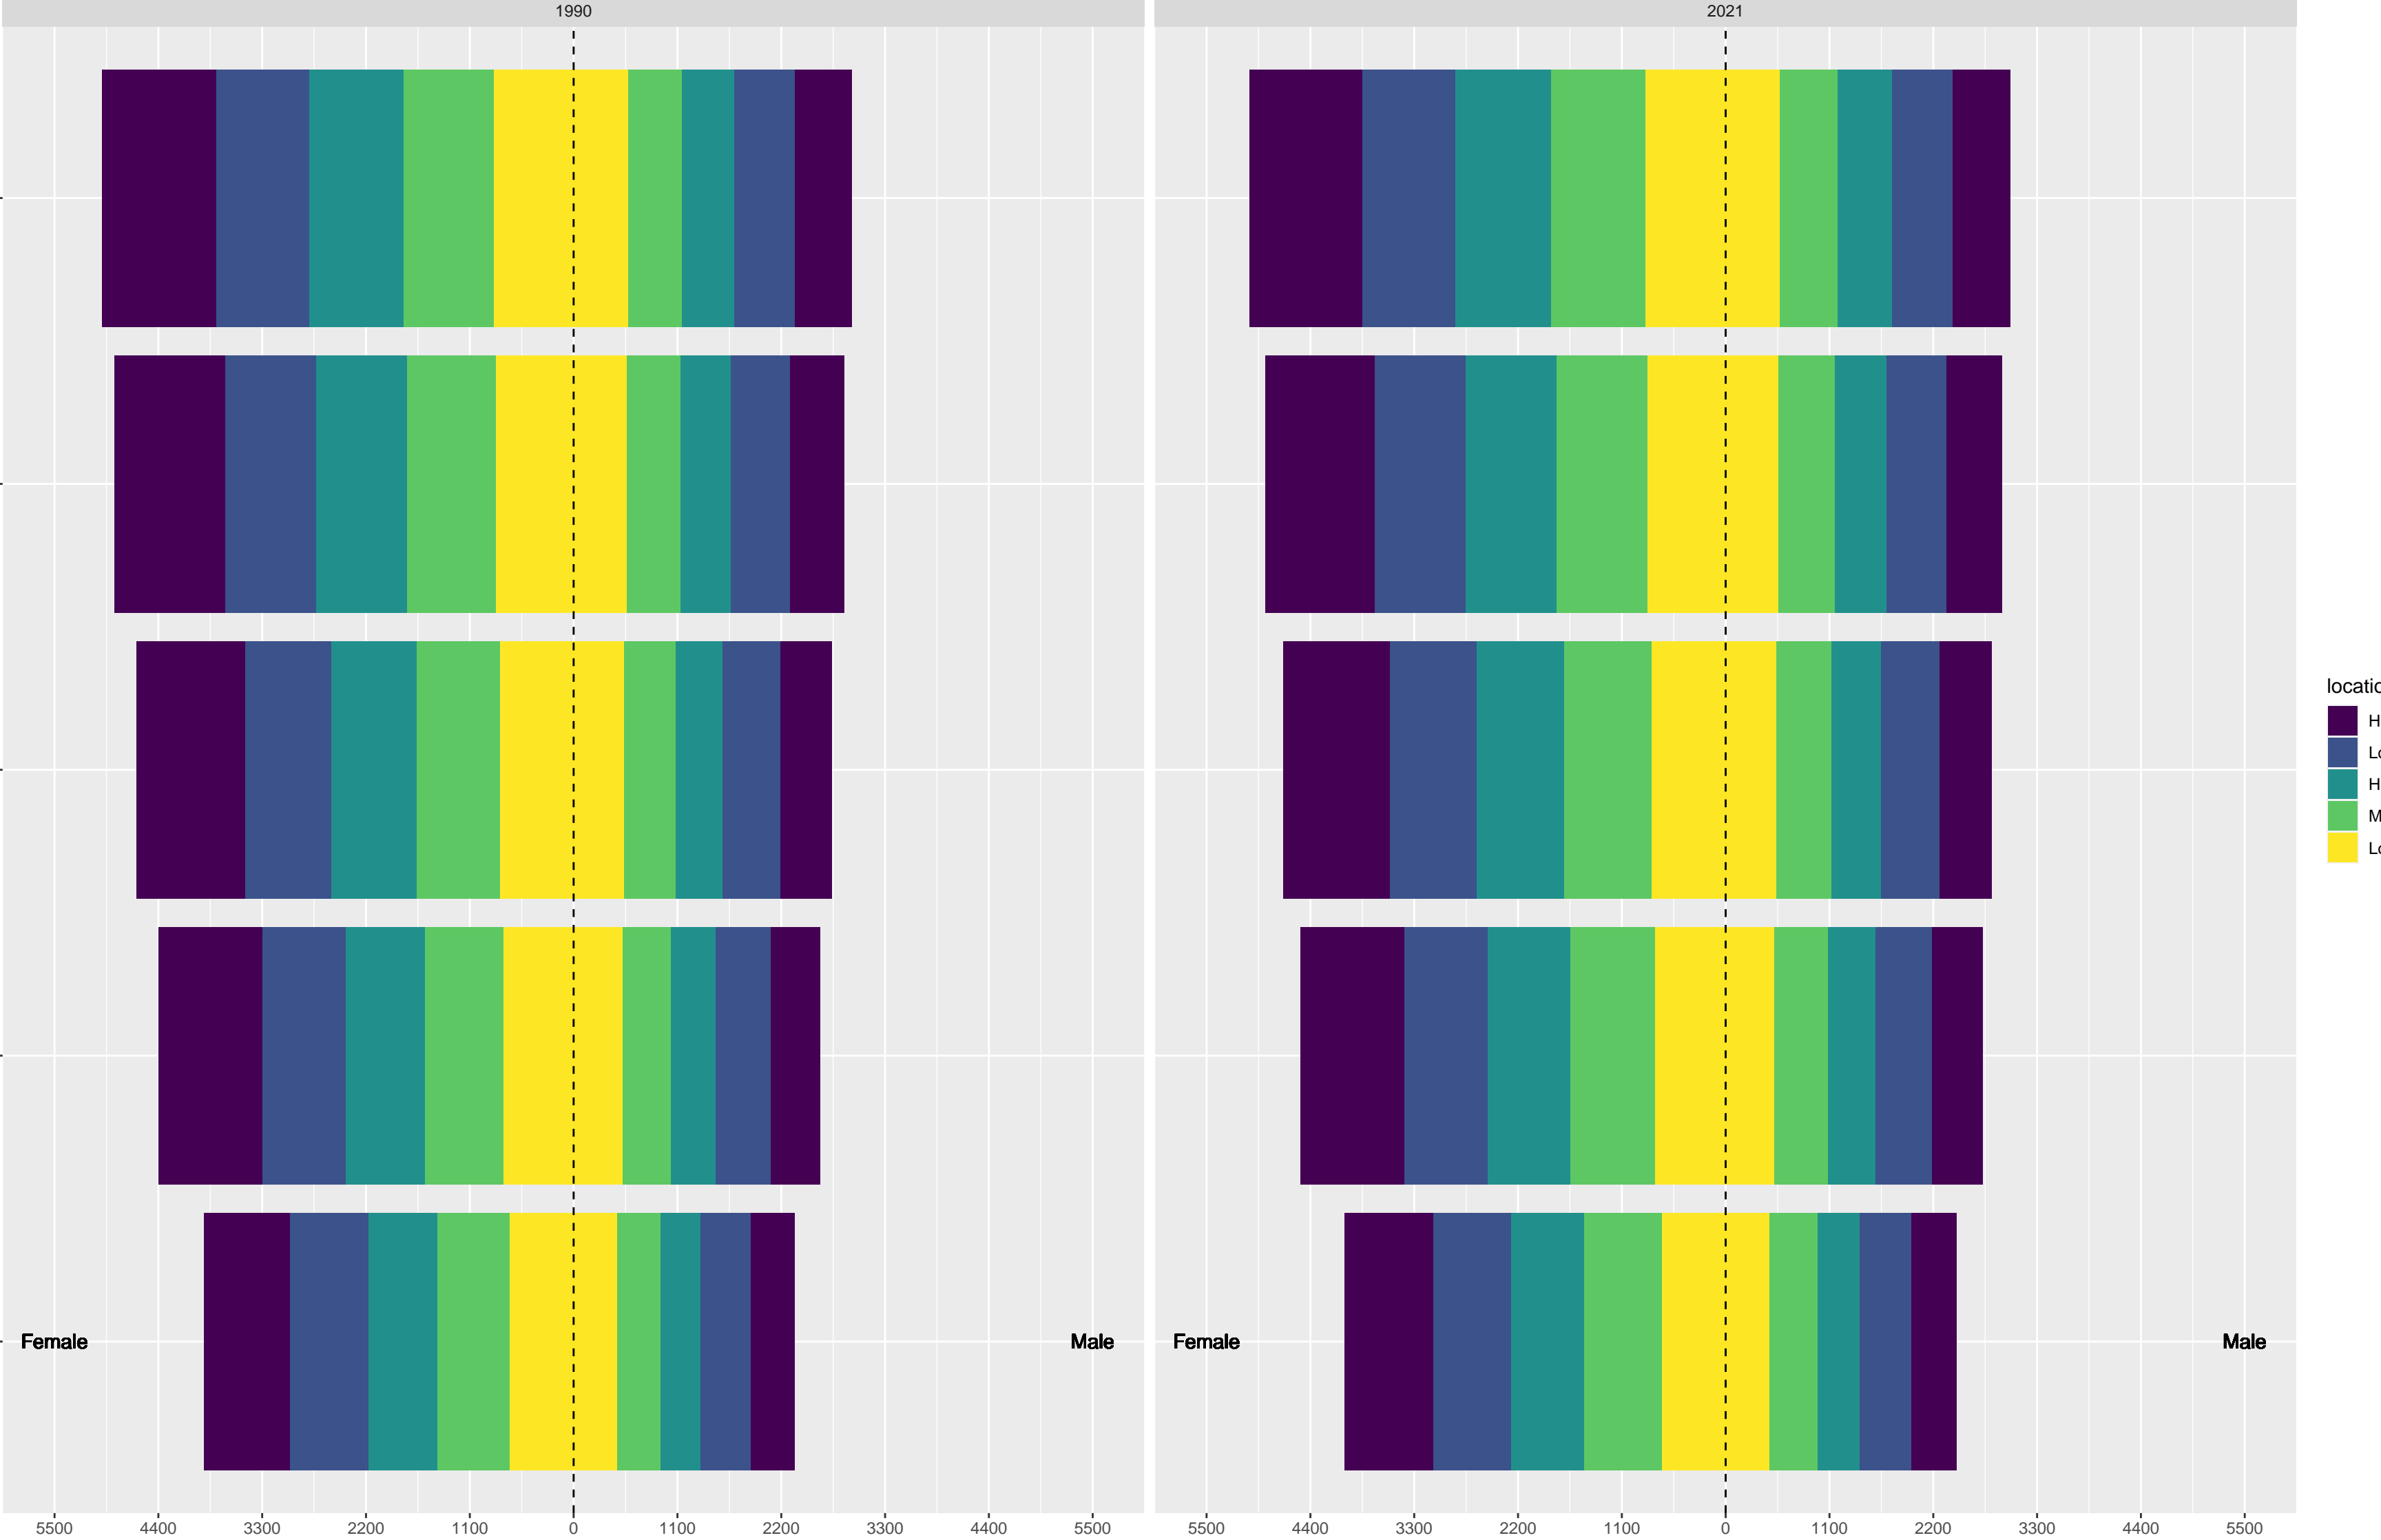

Supplement: 10194_2024_1832_MOESM6_ESM.pdf [file 10194_2024_1832_MOESM6_ESM.pdf]
