# Supplementary material for: Global, regional, and national burden and trends of migraine among youths and young adults aged 15–39 years from 1990 to 2021: findings from the global burden of disease study 2021
Source: PubMed Central journal article supplement (PMC11318134; doi:10.1186/s10194-024-01832-0), 2024-08-12

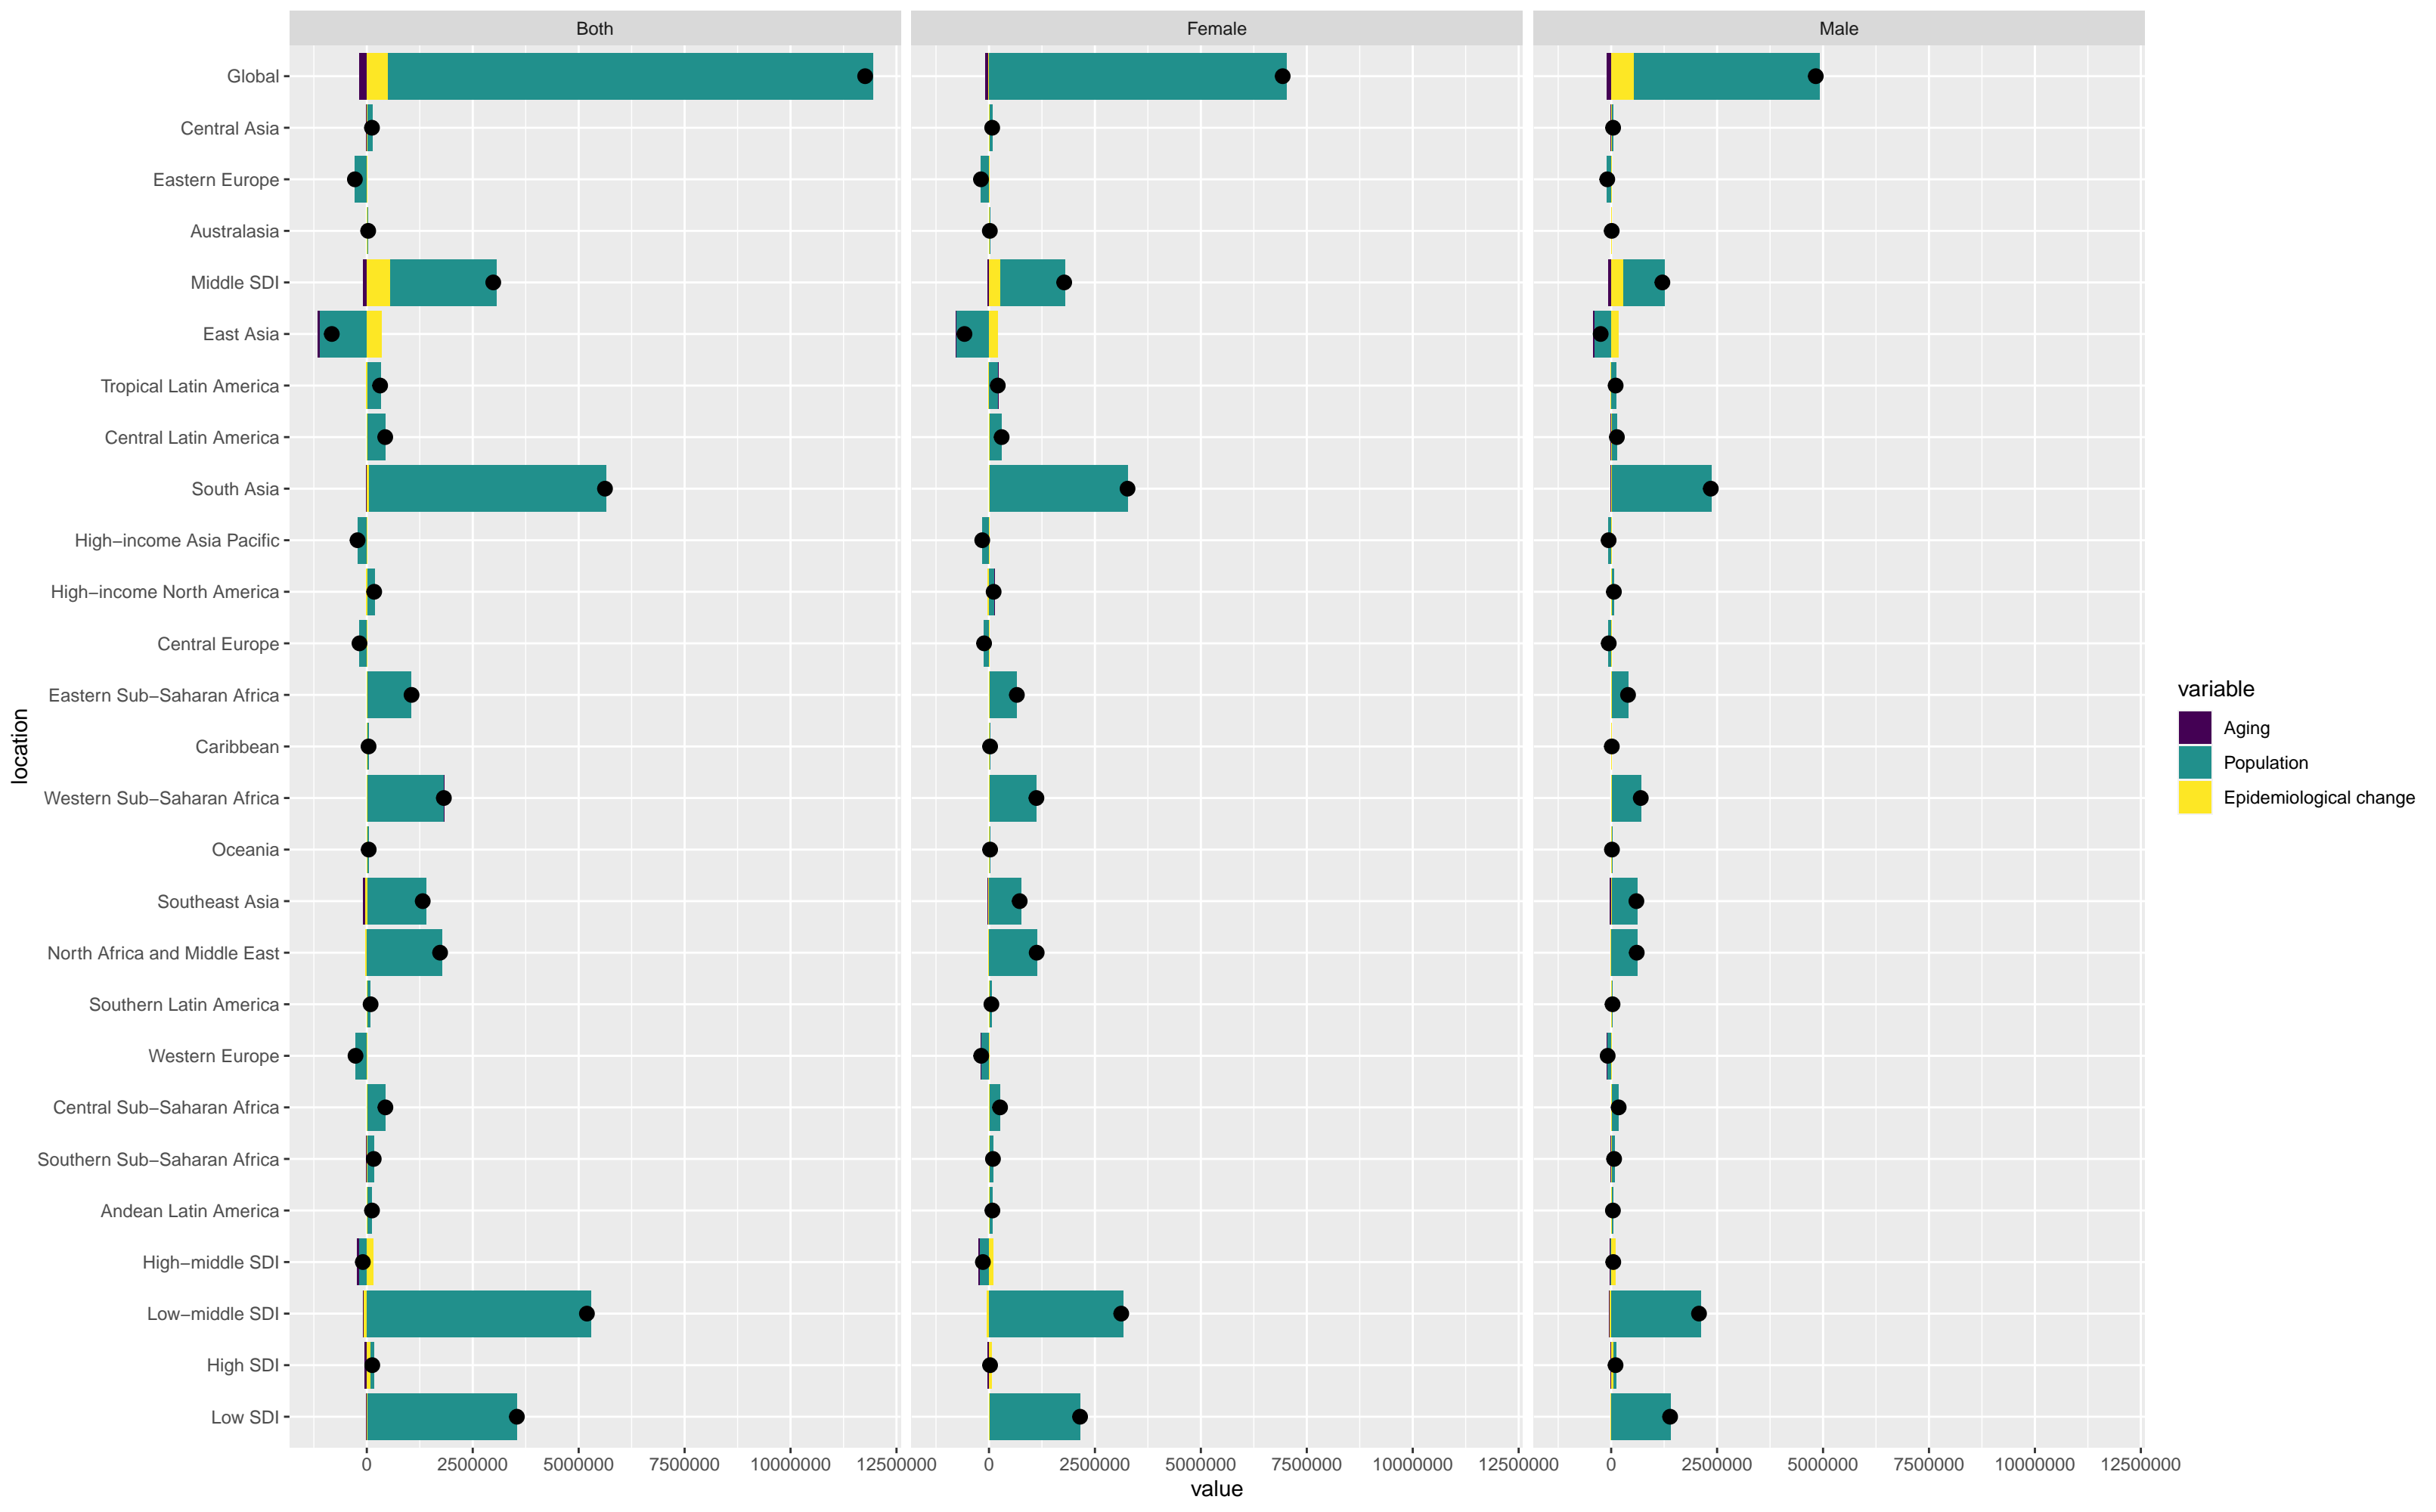

Supplement: 10194_2024_1832_MOESM18_ESM.pdf [file 10194_2024_1832_MOESM18_ESM.pdf]
